# Supplementary material for: Alternative Splicing of Barley Clock Genes in Response to Low Temperature
Source: PubMed Central journal article supplement (PMC5154542; doi:10.1371/journal.pone.0168028), 2016-12-13
Supplement: pone.0168028.s002.pdf [file pone.0168028.s002.pdf]

**a**

AtPRR3 ttgattgggttttgcatttataaaaaatagttagAGTTCCTGGACAAAAAGAG  
AtPRR7 aggttgattttgacatacctttttttgttcagAGCTCTGGACGAAAAAG  
SlPRR7 tcttttctgagctctggaatttgtattttgcagAATTCCTGGACAAAGCAAG  
StPRR7 ttctttctgagctctgaaatttgtattttgcagAATTCCTGGACAAAGCAAG  
SlPRR3 tataaatcatcttcttatttcttttttggcagAGTTCGTGGTCTAAAAGGG  
StPRR3 tataaatcatcttcttatttcttttttggcagAGTTCATGGTCTAAAAGGG  
SbPRR73 ttatcagtgacacaatctgttttaaaatgcagAGCTCATGGACAAAACGTG  
ZmPRR73 ttatcagtgacacaatctgtttcaaaatgcagAGCTCATGGACAAAAGCGTG  
OsPRR73 ttctcatgccatcagcctgttttaaaacacagAGTTCATGGACAAAAGCGTG  
BdPRR73 cgatataatgtatataatattttcaaatgcagAGTTCGTGGACAAAAGCGTG  
HvPRR73 ttctcatgccactgatctatttttaaaatgcagAGTTCATGGACGAAGCGTG  
AtPRR73 -----AGTTCATGGACGAAGCGTG  
HvPPDH1 ctagtttctcatcaatttattttaagGCGCAGAGCTCATGGACAAAAGCGTG  
TaPpd-A1 tagttttctcatcaatttattttaaggcgcagAGCTCATGGACAAAAGCGTG  
TaPpd-D1 cagttttctcatcaacttattttaaggcgcagAGCTCATGGACAAAAGCGTG  
TaPpd-B1 aagttttctcatcaatttattttaaggcgcagAGCTCATGGACAAAAGCGTG  
BdPRR37 ctgttttctcatcagctatttttaactcacagAGCTCATGGACAAAAGCTTG  
OsPRR37 aactggttgcctcatcatttttttaagGCGCAGAGCTCATGGACAAAAGCGTG  
SbPRR37 ttgttccctcattaatctgttacaagGCGCAGAGCTCATGGACTAAGTGTG  
ZmPRR37 ttgtttactggttaatgtcataagGCACAGAACCTGTGGACTAAGCTTG

↑  
3'ss alt 3'ss

**b**

AtPRR3 AGGAACAAATAGgtaagaacgcaaatlaatta-----gtcaattaaaatgtgagtacactgatcttctgtggaacaat  
AtPRR7 AGTAATCAGTTGGTTGCACCACCTGCTGAGAAGGAGACTCAAGAACATGATGATAA---ATTTGgtaagaaagga  
SlPRR7 GCTTACAAGAATGCACAGAGAAATGCCAAAAGGAAATGCCAAGAAGAAGAACATCCTGgtaatgagtatttct  
StPRR7 GCTAACAAGAATTCACAGAGAAATGCCAAAAGGAAATGCCAAGAAGAAGAACATCCTGgtaatgagtatttcta  
SlPRR3 AGTGTACCTGGGTGCTGCAAAATGCCACAAGAAGATGTCTCAATGAGAAGGATGAACTGGgtaggtggctcttcc  
StPRR3 AGTGTACCTGGGTGCTGCAAAATGCCACCAGAAAATGCCTCAATGAGAAGGATGAACTGGgtaggtggctcttcc  
SbPRR73 AGTAACAAGTGGCTACCGACAGCAAAACAAAAGGAAATGGCAAGAAACATAAGGAGAA---TAAAGgatatcatatgct  
ZmPRR73 AGTAACAAGTGGTTACCGACAGCAAAACAAAAGGAAATGTCAAGAAACAGAAGGAGAA---TAAAGgatatgctcca  
OsPRR73 AGCAACAGGTGGTTACCGACTGCAAAATAAAAGGAGCGGAAAAGAAACATAAAAGAAA---TAACGgtaactatgcttg  
BdPRR73 AGCAATAGGTGGTTGCCAACTGAAAAATAAAAGAAACAGTAATAATCAAAAAGAGAG---TAATGgtagtctcgata  
HvPRR73 AGCAATAGGTGGTTGCCACTGCAAAATAAAAGGAAATCAATAATCAAAAAGAAA---TAATGgtagtctgattct  
AtPRR73 AGCAATAGGTGGTTGCCACTGCAAAATAAAAGGAAATCAATAATCAAAAAGAAA---TAATG-----  
HvPPDH1 AGCAATAGATGGTTACCAGGTACAAATAACAAAAAATGCCAGAAACCAAAAGAAACCACTAATGgtagtggtagct  
TaPpd-A1 AGCAACAGATTAA---GAGGTACAGATAACAAAAAATGCCAGAAACCAAAAGAAAC---TAATGgtagtggtagct  
TaPpd-D1 AGCAATAGATTAA---GAGGTACAAATAACAAAAAATGCCAGAAACCAAAAGAAAC---TAATGgtagtggtagct  
TaPpd-B1 AGCAATAGATTAA---GAGGTACAGATAACAAAAAATGCCAGAAACCAAAAGAAAC---TAATGgtagtggtagct  
BdPRR37 AGCAATAGATGGTTACCAGGTACAAACAACAAAAAATGCAAGAAACCAAAAGGAAA---TAATGgtagtggtagct  
OsPRR37 AGCAATAGATGGTTACCATGTACAAGCAACAAAAATCCAAAGAAACCAAAAGAAAC---TAATGgtagtggtagct  
SbPRR37 AGCAACAGACGGCTACCAGGTACGAGCAACAGAAACTGCATGAAGCAAAAATACAC---TAATGgtagtggtagct  
ZmPRR37 AGCAACAGATGGCTACCAGATTAAGAGCAACAGAAACTGCAAGAAAGCAAAAACAC---TAATGgtagtggtagct

↑  
alt 5'ss

↑  
5'ss
