# Supplementary material for: Alternative Splicing of Barley Clock Genes in Response to Low Temperature
Source: PubMed Central journal article supplement (PMC5154542; doi:10.1371/journal.pone.0168028), 2016-12-13

*AtGI*

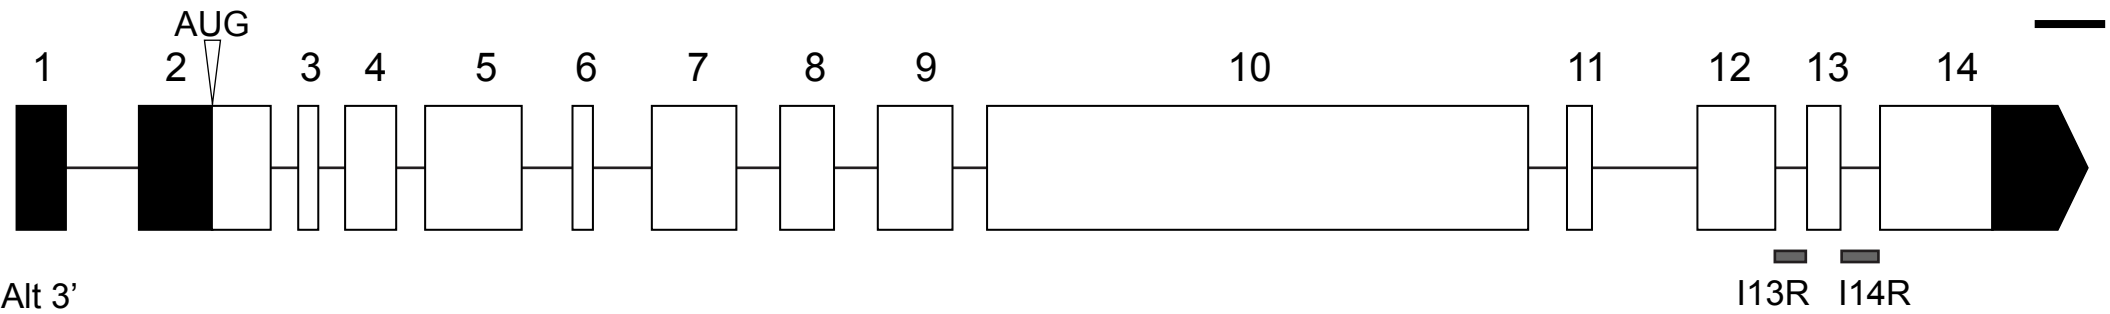

*HvGI*

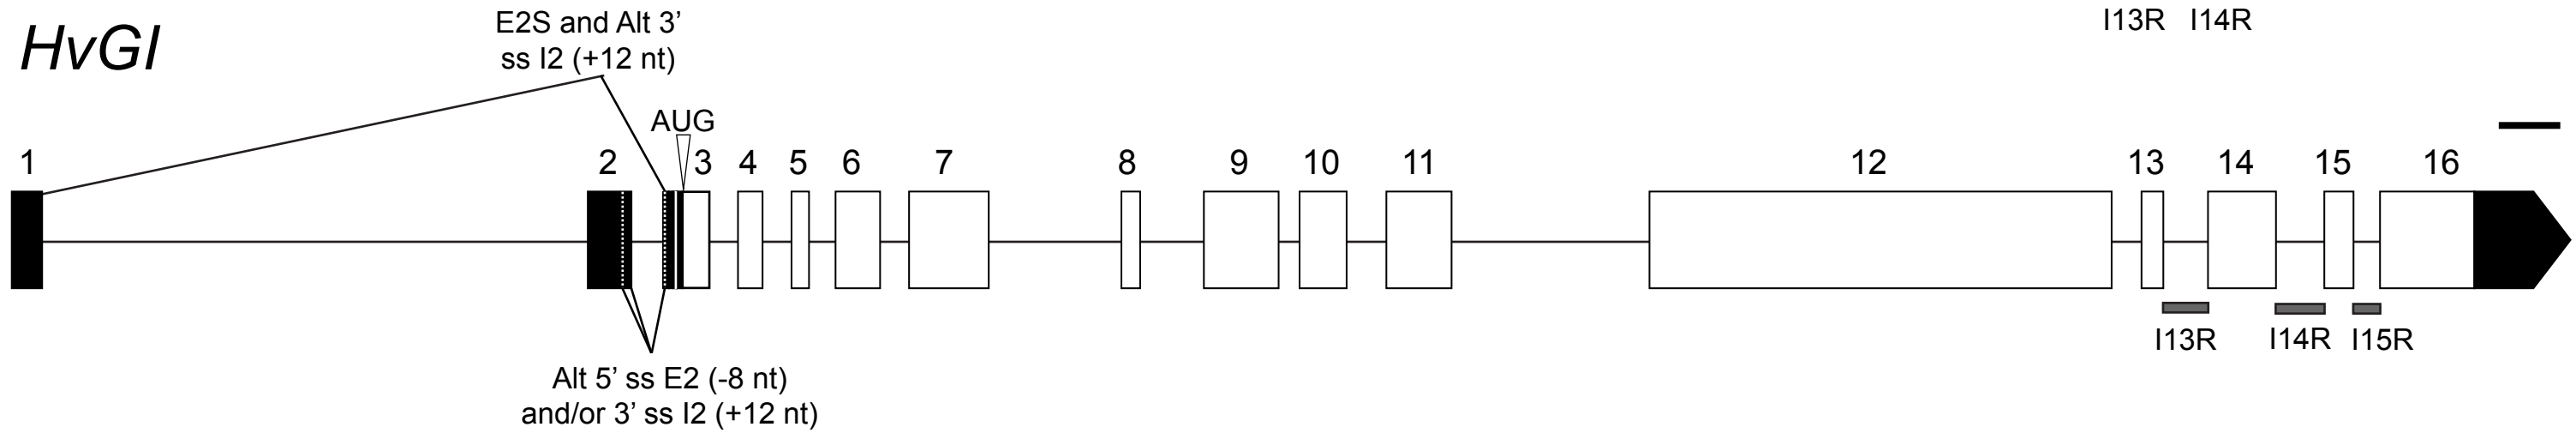

*HvCO2*

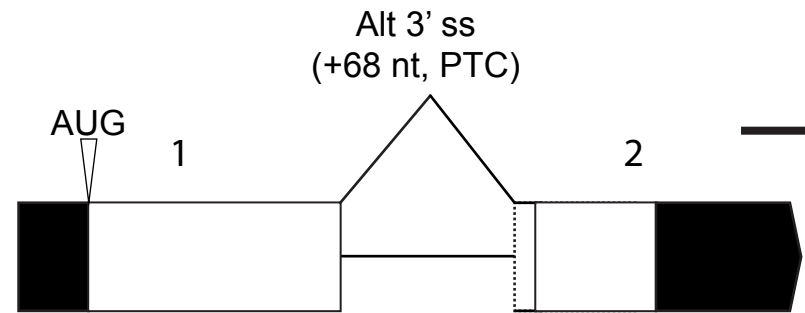

*AtTOC1*

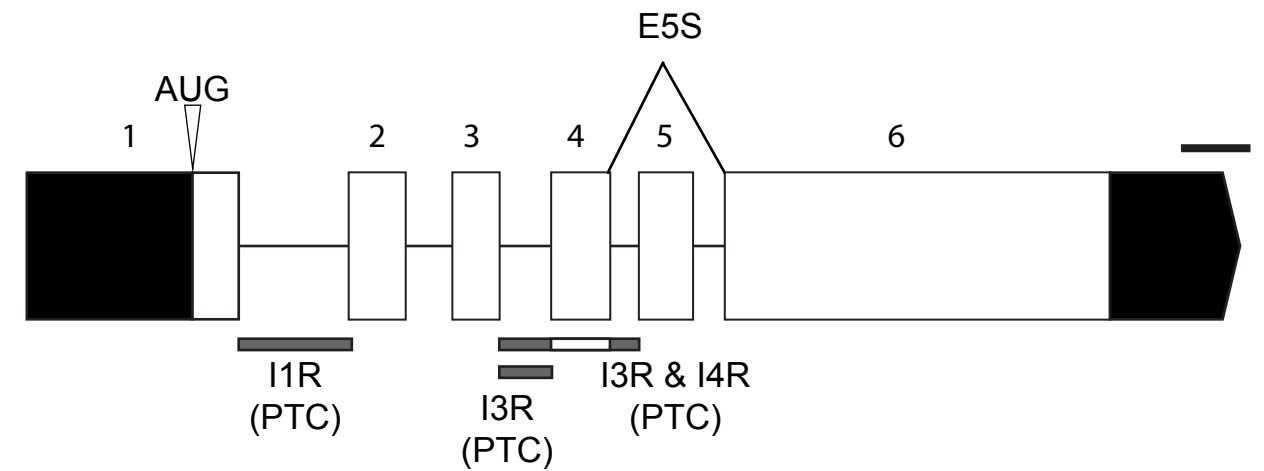

*HvTOC1*

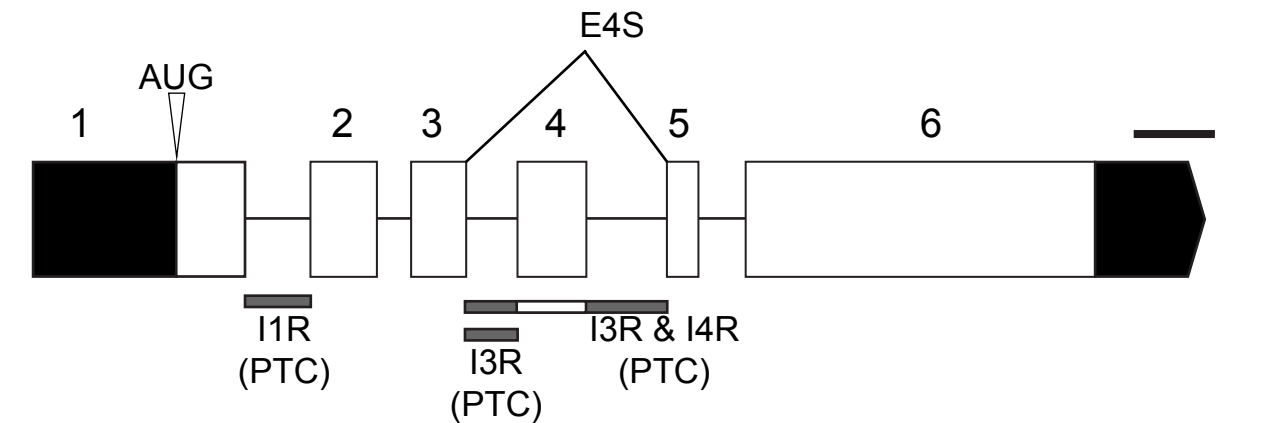

Supplement: pone.0168028.s003.pdf [file pone.0168028.s003.pdf]
