# Supplementary material for: Alternative Splicing of Barley Clock Genes in Response to Low Temperature
Source: PubMed Central journal article supplement (PMC5154542; doi:10.1371/journal.pone.0168028), 2016-12-13

***ELF3* relative expression**

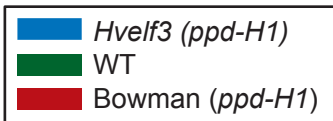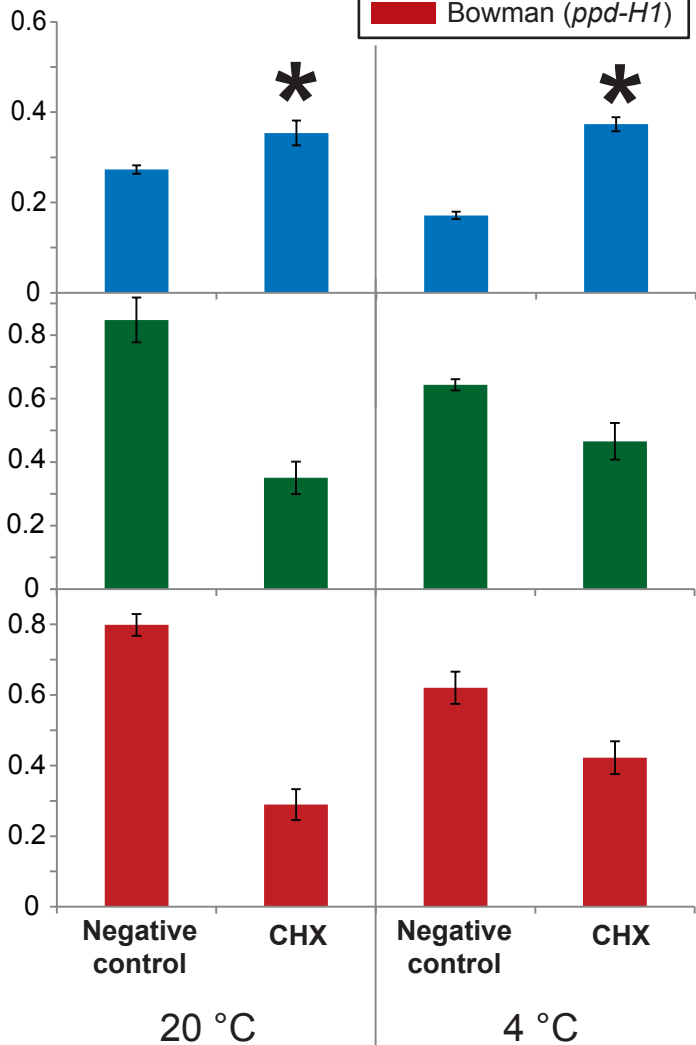

Supplement: pone.0168028.s004.pdf [file pone.0168028.s004.pdf]
