# Supplementary material for: Alternative Splicing of Barley Clock Genes in Response to Low Temperature
Source: PubMed Central journal article supplement (PMC5154542; doi:10.1371/journal.pone.0168028), 2016-12-13
Supplement: pone.0168028.s006.pdf [file pone.0168028.s006.pdf]

**a***HvLHY* total transcripts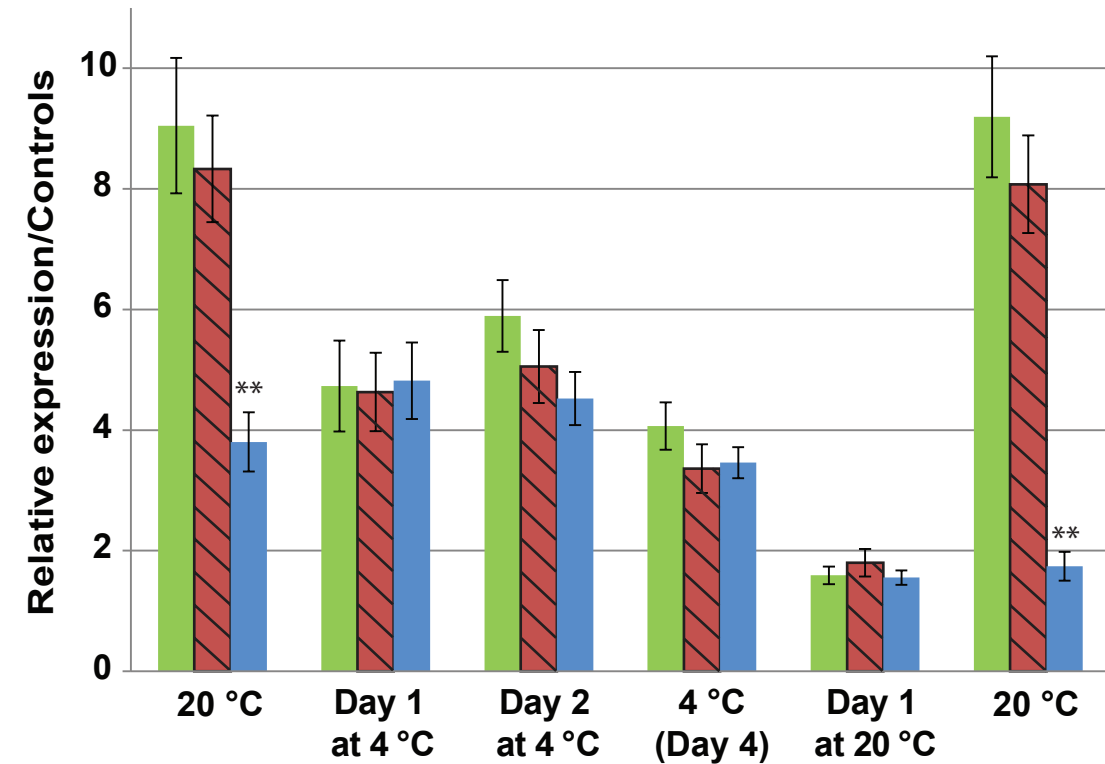**b***HvPPD-H1* total transcripts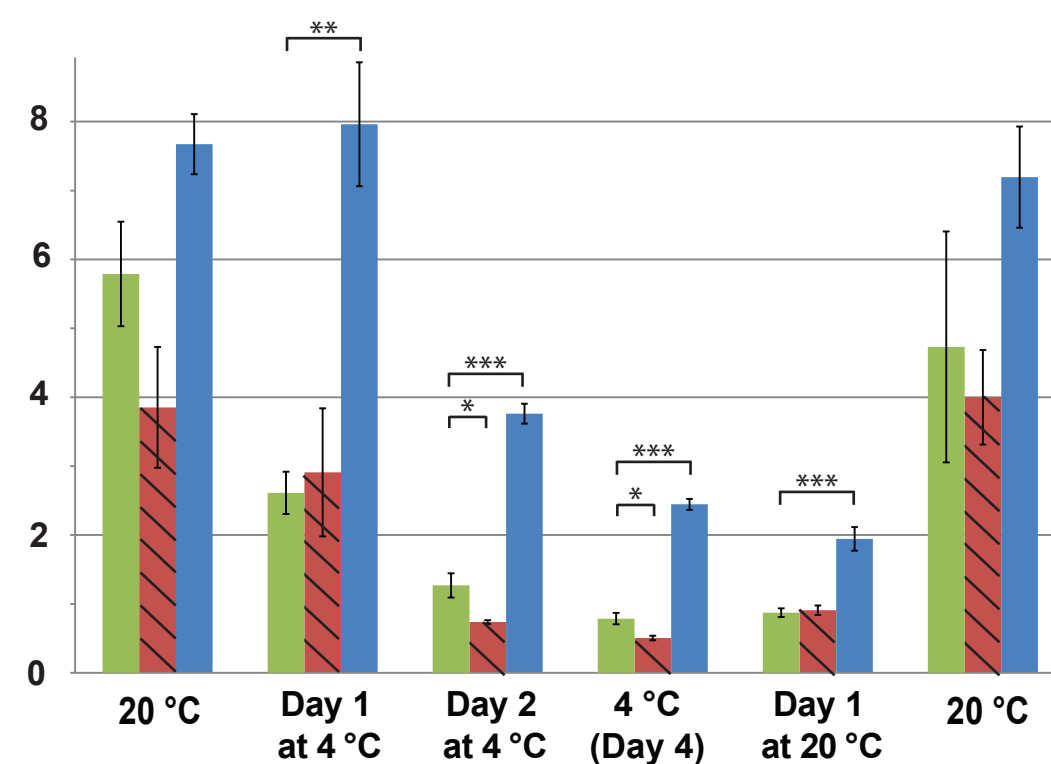**c***HvPRR73* total transcripts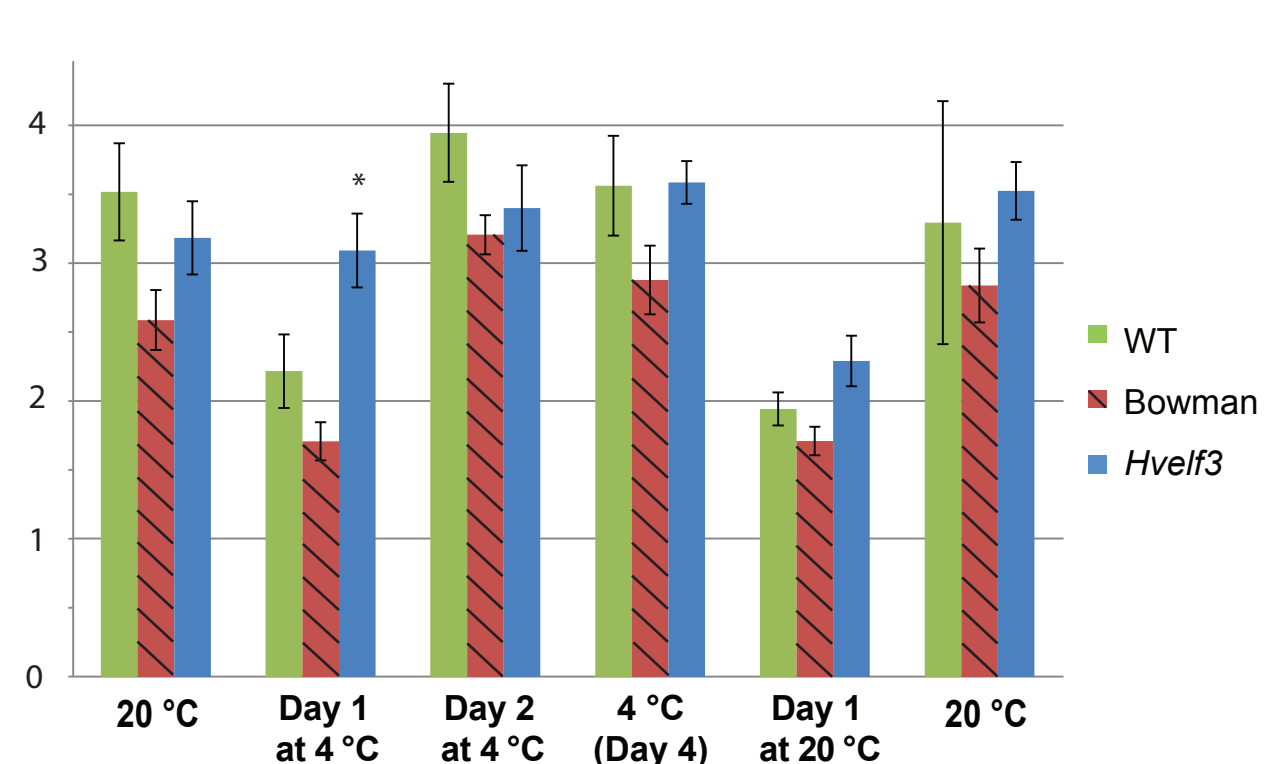

■ WT  
▨ Bowman  
■ *Hveif3*
