# Supplementary material for: Alternative Splicing of Barley Clock Genes in Response to Low Temperature
Source: PubMed Central journal article supplement (PMC5154542; doi:10.1371/journal.pone.0168028), 2016-12-13
Supplement: pone.0168028.s007.pdf [file pone.0168028.s007.pdf]

*HvLHY*  
Exon 4 - Exon 6

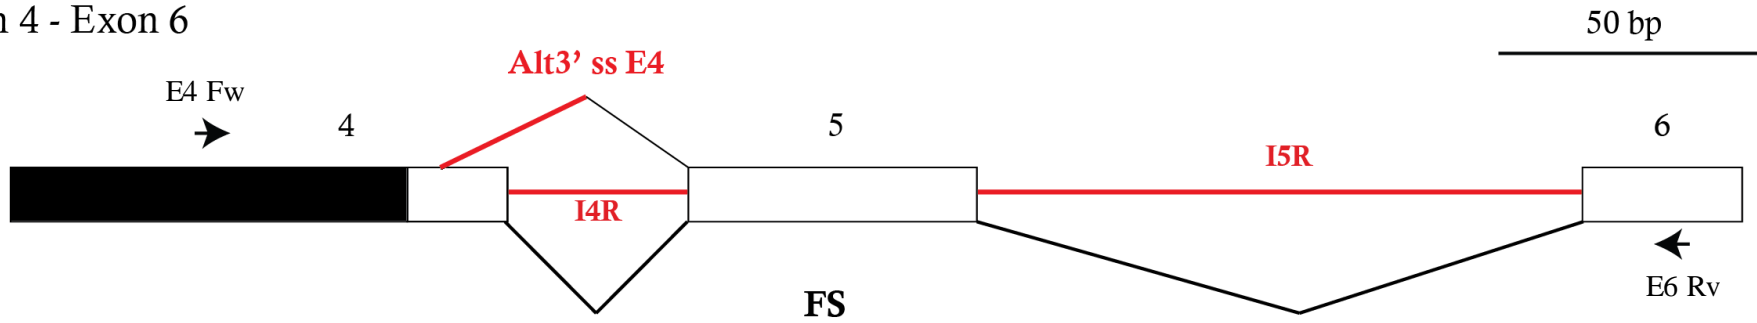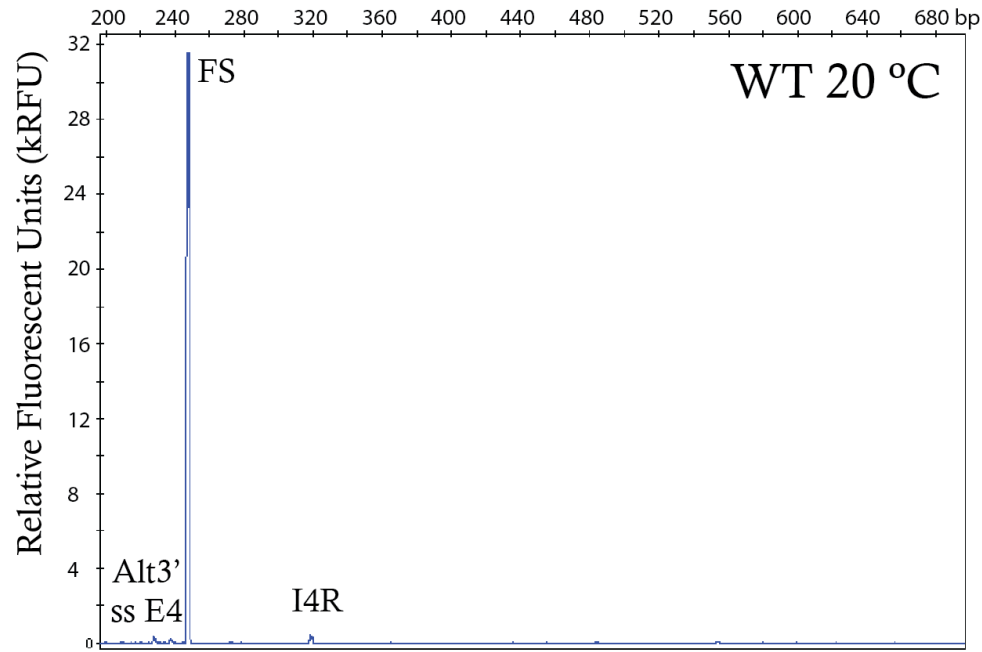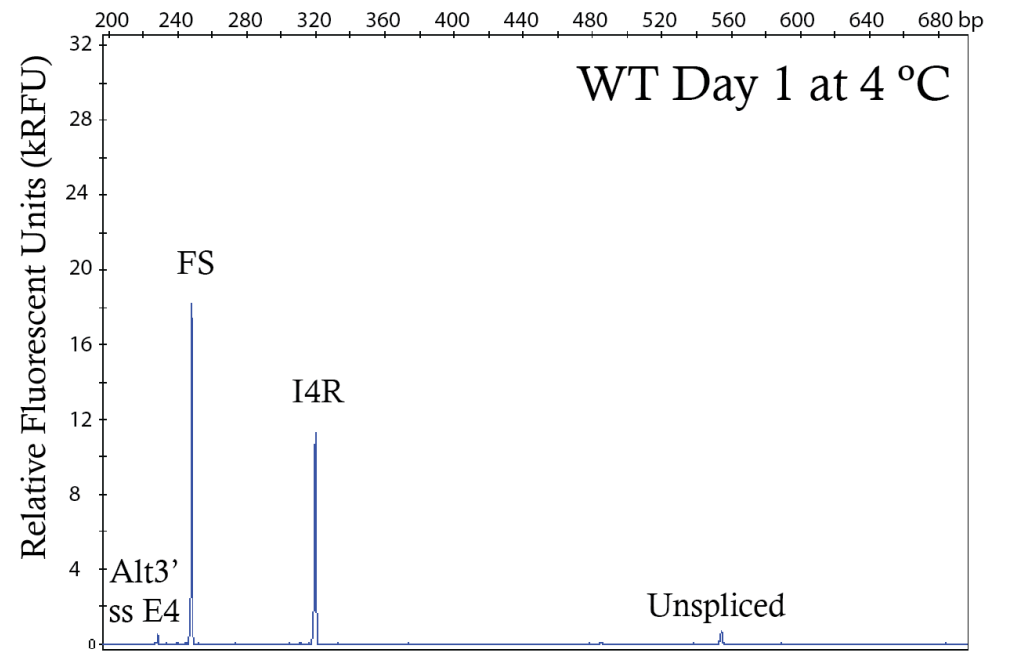

1  
2  
3
