# Supplementary material for: Alternative Splicing of Barley Clock Genes in Response to Low Temperature
Source: PubMed Central journal article supplement (PMC5154542; doi:10.1371/journal.pone.0168028), 2016-12-13
Supplement: pone.0168028.s009.pdf [file pone.0168028.s009.pdf]

**Table S1. Barley gene-specific primers and their sequences used for expression and AS analyses.**

| Genes             | Primer name    | Sequence (5' → 3')        |
|-------------------|----------------|---------------------------|
| <i>LHY</i>        | HvLHY-Ex6Fw    | AACAAAGCGACCAGTTGTCAGCAC  |
|                   | HvLHY-Ex8Rv    | TGAGCATGGCTTCTGATTGACAG   |
| <i>TOC1</i>       | HvPRR1-Ex3Fw   | TCTGTTGTTGTCAAGTGCTTGCGG  |
|                   | HvPRR1-Ex6Rv   | CAATGAGCTGTTTGTCTGGAGTGCT |
| <i>PPD-H1</i>     | HvPpdH1-Ex1Fw  | GGAGTTCCTACACAGGAAGACCAT  |
|                   | HvPpdH1-Ex4Rv  | TCGTCTGTTGCGATCATTGCTGTTG |
| <i>PRR59</i>      | HvPRR59-Ex7Fw  | TGGACTGTGAGCGGTGAAACTGAT  |
|                   | HvPRR59-3UTRv  | TCACCTGGGAAGGGAGGTATCAAA  |
| <i>PRR95</i>      | HvPRR95-Ex6FwB | GCTGAACAACCTCTGGCAACAGCAA |
|                   | HvPRR95-3UTRv  | TTCAAAGGACACACCAAATCGGCG  |
| <i>PRR73</i>      | HvPRR73-Ex3Fw  | TAACTGAGGTCGCCATGCCTTGT   |
|                   | HvPRR73-Ex5Rv  | TCATCATGACTGCCGCCACTGTTT  |
| <i>LUX</i>        | HvLUXFw        | GGCTCCTTCCCGTCCCTCC       |
|                   | HvLUXRv        | TTGACGTAGAGGCGTACTTCTGGA  |
| <i>ELF3</i>       | HvELF3-Ex2Fw   | TCTCCAGATGATGTTGTCGGTGCT  |
|                   | HvELF3-Ex4Rv   | TGAGATGGTGAAGCCTGGTTTCCCT |
| <i>ZTLa</i>       | HvZTLa-5UTRFw  | AGGAGGAGGGATAGGAGGCG      |
|                   | HvZTLa-Ex2Rv   | AGGGGTGAGATGCAACCTGT      |
| <i>FKF1</i>       | HvFKF1-Ex1Fw   | CGGGGCTGGGGATGGCAGGC      |
|                   | HvFKF1-Ex2Rv   | ATCGGTTGTTTACTGGAGCT      |
| <i>GI</i>         | HvGI-Ex14Fw    | TCGTGCTACAGATGGGATGCTTGT  |
|                   | HvGI-Ex16Rv    | GTCCACTGTTCAAGATGTCACGGA  |
| <i>CABa</i>       | HvCABa-5UTRFw  | AACACACGACACACCTCTAGCCTT  |
|                   | HvCABa-3UTRv   | TGTGCAGTTCAGTGTAGTCGCCTT  |
| <i>CO1</i>        | HvCO1-Ex1Fw    | TGTGAGAAGGCCACATCAGAGTGG  |
|                   | HvCO1-Ex2Rv    | ATGTCTGGTCCACTTCCATTTCCGC |
| <i>CO2</i>        | HvCO2-Ex1FwB   | GAGCAGCAAGGGAGCAATTA      |
|                   | HvCO2-3UTRv    | TACGGTGCCCATCATTCCATGTGT  |
| <i>ELF4-likeA</i> | HvELF4likeAFw  | ATATCCATCTTCTCCCGCACGCA   |
|                   | HvELF4likeARv  | ATGGTCTGCCTCCTCTACTGTGT   |
| <i>FT1</i>        | HvFT1-5UTRFw   | ACAGCTTACATTGCTGCTCTCTGC  |
|                   | HvFT1-3UTRv    | TGGATAATTTGGTGACTTGGCGGC  |
| <i>PP2AA2</i>     | HvPP2AA2-Ex2Fw | CCGCATTGGTGACAGATGAAAGA   |
|                   | HvPP2AA2-Ex3Rv | CCAAGATTTGATGCAGCTGCCCTT  |
| <i>UBC21</i>      | HvUBC-Ex3Fw    | AGTACAAGGAGGTGCAGCGAGAAA  |
|                   | HvUBC-Ex4Rv    | CTGCTCGGGAATTGAGAATGCAAG  |

Primer name includes directions: Fw is Forward, whereas Rv is Reverse.
