# Supplementary material for: Alternative Splicing of Barley Clock Genes in Response to Low Temperature
Source: PubMed Central journal article supplement (PMC5154542; doi:10.1371/journal.pone.0168028), 2016-12-13
Supplement: pone.0168028.s010.pdf [file pone.0168028.s010.pdf]

**Table S2. Barley clock gene-specific primers used in AS analyses and their sequences.**

| Genes        | Primer name    | Sequence (5' → 3')        |
|--------------|----------------|---------------------------|
| <i>LHY</i>   | HvLHY-Ex3Fw    | GCAAAGTACTGGAATTTCTGAGCCC |
|              | HvLHY-Ex8Fw    | CGTGCAAATCAGAAGCCATGCTCA  |
|              | LHY-Ex10FwC    | GCTAACGACAAGACACAGCAAGCA  |
|              | HvLHY-Ex6Rv    | GTGCTGACAACTGGTCTGCTTTGTT |
|              | LHY-Ex9Rv      | TTGGAAGTTCTCTGGTGGGTGTCT  |
|              | HvLHY-Ex8aRv   | AGGACAAGCAGCAAAGAACAGAA   |
|              | LHY-3UTRv      | GGGCTCAGAAATTCAGTACTTTGC  |
| <i>TOC1</i>  | HvPRR1-5UTRFwB | GCCGGACTGCGACGGGCGG       |
|              | HvPRR1-Ex1Fw   | ATGTGCTTCGCCTCCTCTGTAAC   |
|              | HvPRR1-Ex6Fw   | CAAGCACTCCAGCAAACAGCTCAT  |
|              | HvPRR1-Ex1Rv   | AGTTACAGAGGAGGCGAAGCACAT  |
|              | HvPRR1-Ex3Rv   | CCGCAAGCACTTGACAACAACAGA  |
|              | HvPRR1-Ex6Rv   | CAATGAGCTGTTGCTGGAGTGCT   |
| <i>ELF3</i>  | HvPRR1-3UTRv   | GGGTTGAGGATGTATTGTGTGAGC  |
|              | HvELF3-Ex4Fw   | AGGAAACCAGGCTTACCATCTCA   |
| <i>PPDH1</i> | HvELF3UTRv     | TTTCTTTCTTTCTGCCGCCAAC    |
|              | HvPpdH1-5UTRFw | TTCCAGGAGAGGATTTCATTCGGT  |
| <i>GI</i>    | HvPpdH1-Ex4Fw  | CAACAGCAATGATCGCAACGACGA  |
|              | HvPpdH1-Ex6fwb | TGCCATATCTTGAGCTGAGCCTGA  |
|              | HvPpdH1-Ex7Fw  | TCCAGTGTGTCAATCCTTCGGGT   |
|              | HvPpdH1-Ex1Rv  | GGATGGTCTTCTGTGTAGGAACT   |
|              | HvPpdH1-Ex6Rv  | AAGTCAGCAGCTCGAACAATTGGC  |
|              | HvPpdH1-Ex7Rv  | ACCCGAAGGATTGACAACACTGGA  |
|              | HvPpdH1-3UTRv  | TATAGCTAGGTGCGTGGCGGGA    |
|              |                | TTCGCCTCTGCCTCAGCCTC      |
| <i>PRR59</i> | HvGI-5UTRFw    | ACACCTCTGACCAGGTCACAACAA  |
|              | HvGI-Ex7Fw     | ACTGCAATGTCTATGAGGGCTGGT  |
|              | HvGI-Ex11Fw    | AACAGCACCAGCTCATCGGTAAT   |
|              | HvGI-Ex12FwB   | CGCTGTCAGATGTGAAGTACCAA   |
|              | HvGI-Ex4Rv     | TTGTTGTAGCCTGGTCAGAGGTGT  |
|              | HvGI-Ex7Rv     | AGACATTGCAGTTCGAATCGCAGC  |
|              | HvGI-Ex11Rv    | ATTACCCGATGAGCTGGTGTCTGT  |
|              | HvGI-Ex12RvB   | ACAAGCATCCCATCTGTAGCACGA  |
|              | HvGI-Ex14Rv    | AGACTGGGAATGAAAAGCCATCCT  |
|              | HvGI-3UTRv     | CACGGTGCTAAAAGTGCATGCAGAA |
| <i>PRR95</i> | HvPRR59-Ex3Fw  | TAATGTGGCAAGCTACCCAGAGA   |
|              | HvPRR59-Ex5Fw  | TCTCTGGGTGAGCTTGCCACATTA  |
|              | HvPRR59-Ex5RvB | ACGTTGCTGCTTCCCTAAGTTGAC  |
|              | HvPRR59-Ex6Rv  | CAAAGGAGCCTGAGCTTGCAATTGT |
| <i>PRR73</i> | HvPRR59-Ex7RvB | TGGTGGCTACTTGATCTGCGAGT   |
|              | HvPRR95-5UTRFw | AAGAGAATGTCGAGAACAGCAGC   |
|              | HvPRR95-Ex4Fw  | CGTGCTGTTCTGCGACATTCTCTT  |
| <i>FKF1</i>  | HvPRR95-Ex4Rv  | GAGCCGCCAATTTCCATTCTTGT   |
|              | HvPRR95-Ex6Rv  | AAACATCCACGGCTACTTTCACGC  |
|              | HvPRR73-5UTRFw | AGTGTTCCAAACAAAGACTGGTG   |
|              | HvPRR73-Ex5Fw  | ACACAGAATCGGAACAGGCTGCTA  |
|              | HvPRR73-Ex7Fw  | TCCAGCATCACCATCATGGACACT  |
|              | HvPRR73-Ex8Fw  | CAAGGCATGGCGACCTCAGTTAAT  |
|              | HvPRR73-Ex3Rv  | TAGCAGCCTGTTCCGATTCTGTGT  |
|              | HvPRR73-Ex7Rv  | TCCATCTTGCAAGTGGAGTTCGTT  |
| <i>FKF1</i>  | HvPRR73-Ex8RvB | TGGCTACTGGCTTGTCTCTTCTTA  |
|              | HvPRR73-3UTRv  | ATTCCTGCTTGACTTGACGAA     |
| <i>FKF1</i>  | HvFKF1-Ex2Fw   | TAACTCTACATGGGACGCTCG     |
|              | HvFKF1-Ex2RvB  |                           |
