# Supplementary material for: Alternative Splicing of Barley Clock Genes in Response to Low Temperature
Source: PubMed Central journal article supplement (PMC5154542; doi:10.1371/journal.pone.0168028), 2016-12-13
Supplement: pone.0168028.s011.pdf [file pone.0168028.s011.pdf]

**Table S3. AS events in barley clock and clock-related genes detected by HR RT-PCR experiments.**

| Gene                         | Primer pair                | Primer position | Product size (bp)          | AS event name     | Sequencing                          | AS event                               | Transcript abundance |                      |      |
|------------------------------|----------------------------|-----------------|----------------------------|-------------------|-------------------------------------|----------------------------------------|----------------------|----------------------|------|
| <i>LHY</i>                   | HvLHY-Ex3Fw<br>HvLHY-Ex6Rv | 5' UTR          | 278                        | FS                | NGS, Sanger                         | FS                                     | ****                 |                      |      |
|                              |                            |                 | 268                        | Alt 3' ss E4      | Sanger                              | Alt 3' ss E4 (-10 nt)                  | **                   |                      |      |
|                              |                            |                 | 294                        | Alt 3' ss I2      | NGS, Sanger                         | Alt3' ss I2 (+16 nt)                   | *                    |                      |      |
|                              |                            |                 | 358                        | Alt 3' ss I1      | NGS, Sanger                         | Alt 3' ss I1 (+80 nt)                  | **                   |                      |      |
|                              |                            |                 | 393                        | I2R               | NGS, Sanger                         | Intron 2 retained                      | *                    |                      |      |
|                              |                            |                 | 440                        | I1R               | Sanger                              | Intron 1 retained                      | -                    |                      |      |
|                              |                            |                 | 555                        | I1R + I2R         | Sanger                              | Introns 1 and 2 retained               | -                    |                      |      |
|                              |                            |                 | 666                        | I3R               | Sanger                              | Intron 3 retained                      | -                    |                      |      |
|                              |                            |                 | 746                        | Alt 3' ss I1+ I3R | Predicted                           | Alt 3' ss I1 (+80 nt) and I3 retained  | -                    |                      |      |
|                              |                            |                 | 781                        | I2R + I3R         | Sanger                              | Introns 2 and 3 retained               | -                    |                      |      |
|                              |                            |                 | 943                        | I1R, I2R + I3R    | Sanger                              | Introns 1, 2 and 3 retained, unspliced | -                    |                      |      |
|                              |                            |                 | HvLHY-Ex6Fw<br>HvLHY-Ex8Rv | MYB-coding domain | 255                                 | FS                                     | NGS, Sanger          | FS                   | **** |
|                              |                            |                 |                            |                   | 235                                 | Alt 5' ss E4                           | NGS                  | Alt5' ss E4 (-20 nt) | -    |
|                              |                            |                 |                            |                   | 325                                 | I4R                                    | NGS                  | Intron 4 retained    | *    |
| 490                          | I5R                        | Predicted       |                            |                   | Intron 5 retained                   | -                                      |                      |                      |      |
| 560                          | I4R + I5R                  | Predicted       |                            |                   | Introns 4 and 5 retained, unspliced | -                                      |                      |                      |      |
| HvLHY-Ex8Fw<br>HvLHY-Ex9Rv   | Span long intron 6         | 188             | FS                         | NGS, Sanger       | FS                                  | ****                                   |                      |                      |      |
|                              |                            | 938             | Alt E6a                    | NGS, Sanger       | Alt E6a from intron 6 (+756 nt)     | -                                      |                      |                      |      |
|                              |                            | 1833            | I6R                        | Unknown           | Intron 6 retained                   | -                                      |                      |                      |      |
| HvLHY-Ex10FwB<br>HvLHY-3UTRv | C-terminus coding region   | 916             | FS                         | NGS               | FS                                  | ****                                   |                      |                      |      |
|                              |                            | 1005            | I8R                        | NGS               | Intron 8 retained, unspliced        | **                                     |                      |                      |      |

| Gene         | Primer pair                     | Primer position                           | Product size (bp) | AS event name             | Sequencing        | AS event                                                  | Transcript abundance |
|--------------|---------------------------------|-------------------------------------------|-------------------|---------------------------|-------------------|-----------------------------------------------------------|----------------------|
| <i>PRR37</i> | HvPpdH1-5UTRFw<br>HvPpdH1-Ex1Rv | 5' UTR and<br>coding region               | 250               | FS                        | NGS, Sanger       | FS                                                        | ****                 |
|              |                                 |                                           | 194               | Unknown                   | Unknown           | Unknown                                                   | **                   |
|              |                                 |                                           | 230               | Unknown                   | Unknown           | Unknown                                                   | *                    |
|              |                                 |                                           | 246               | Alt 3' ss E2              | NGS               | Alt 3' ss E2 (-4 nt)                                      | -                    |
|              |                                 |                                           | 362               | I1R                       | NGS, Sanger       | Intron 1 retained                                         | ***                  |
|              | HvPpdH1-Ex4Fw<br>HvPpdH1-Ex6Rv  | Exons 3 - 5                               | 456               | FS                        | NGS, Sanger       | FS                                                        | ***                  |
|              |                                 |                                           | 405               | alt 5' and 3' ss E6       | NGS, Sanger       | alt 5' ss E6 (-45 nt)<br>and alt 3' ss E6 (-6 nt)         | ***                  |
|              |                                 |                                           | 411               | alt 5' ss E6              | Sanger            | alt 5' ss E6 (-45 nt)                                     | ***                  |
|              |                                 |                                           | 450               | alt 3' ss E6              | NGS, Sanger       | alt 3' ss E6 (-6 nt)                                      | ***                  |
|              |                                 |                                           | 461               | alt 5' ss I6              | NGS, Sanger       | alt 5' ss I6 (+5 nt), adds PTC                            | ***                  |
|              |                                 |                                           | 547               | alt 3' ss E6 + I6R        | Sanger            | alt 3' ss E6 (-6 nt) and I6R                              | **                   |
|              |                                 |                                           | 553               | I6R                       | Sanger            | Intron 6 retained                                         | *                    |
|              | HvPpdH1-Ex6fwB<br>HvPpdH1-3UTRv | C-terminus<br>coding region               | 902               | FS                        | NGS, Sanger       | FS                                                        | ****                 |
|              |                                 |                                           | 653               | CrIn E8                   | Sanger            | Cryptic Intron E8 (-249 nt), in frame                     | *                    |
| 984          |                                 |                                           | I7R               | NGS, Sanger               | Intron 7 retained | **                                                        |                      |
| <i>PRR73</i> | HvPRR73-5UTRFw<br>HvPRR73-Ex3Rv | 5' UTR and<br>N-terminus<br>coding region | 606               | FS                        | NGS, Sanger       | FS                                                        | ****                 |
|              |                                 |                                           | 599               | alt 3' ss E2              | Predicted         | alt 3' ss E2 (-7 nt), uORF decreased<br>from 36 to 11 aa. | -                    |
|              |                                 |                                           | 861               | alt 5' ss I1 +<br>alt E1a | NGS               | alt 5' ss Intron 1 and Alt E1a<br>(+255 nt)               | -                    |
|              | HvPRR73-Ex3Fw<br>HvPRR73-Ex5Rv  | Exons 3 - 5                               | 320               | FS                        | NGS, Sanger       | FS                                                        | ****                 |
|              |                                 |                                           | 439               | I4R                       | Predicted         | Intron 4 retained                                         | -                    |
|              |                                 |                                           | 465               | I5R                       | NGS               | Intron 5 retained                                         | -                    |
|              |                                 |                                           | 584               | I4R+I5R                   | Predicted         | Introns 4 and 5 retained                                  | -                    |
|              | HvPRR73-Ex5Fw<br>HvPRR73-Ex7Rv  | Exons 5 and 7                             | 549               | FS                        | NGS, Sanger       | FS                                                        | ****                 |
|              |                                 |                                           | 632               | I6R                       | NGS, Sanger       | Intron 6 retained                                         | *                    |
|              | HvPRR73-Ex7Fw<br>HvPRR73-Ex8RvB | Exons 7 and 8                             | 319               | FS                        | NGS, Sanger       | FS                                                        | ****                 |
| 404          |                                 |                                           | I7R               | NGS                       | Intron 7 retained | **                                                        |                      |

| Gene        | Primer pair                    | Primer position                           | Product size (bp)                   | AS event name                  | Sequencing                            | AS event                                       | Transcript abundance |
|-------------|--------------------------------|-------------------------------------------|-------------------------------------|--------------------------------|---------------------------------------|------------------------------------------------|----------------------|
| <i>GI</i>   | HvGI-5UTRFw<br>HvGI-Ex4Rv      | 5' UTR and<br>N-terminus<br>coding region | 391                                 | FS                             | NGS, Sanger                           | FS                                             | ****                 |
|             |                                |                                           | 251                                 | E2S                            | NGS                                   | E2 skipping                                    | **                   |
|             |                                |                                           | 263                                 | E2S + Alt 3' ss I2             | NGS, Sanger                           | E2 skipping and Alt 3' ss I2 (+12 nt)          | ***                  |
|             |                                |                                           | 395                                 | alt 5' ss E2 +<br>alt 3' ss I2 | NGS                                   | alt 5' ss E2 (-8 nt) and alt 3' ss I2 (+12 nt) | ***                  |
|             |                                |                                           | 403                                 | alt 3' ss I2                   | NGS                                   | Alt 3' ss I2 (+12 nt)                          | ***                  |
|             |                                |                                           | 540                                 | I2R                            | NGS, Sanger                           | Intron 2 retained                              | **                   |
|             | HvGI-Ex12FwB<br>HvGI-Ex14Rv    | Exons 12 - 14                             | 402                                 | FS                             | NGS, Sanger                           | FS                                             | ****                 |
|             |                                |                                           | 549                                 | I13R                           | NGS                                   | Intron 13 retained                             | -                    |
|             | HvGI-Ex14Fw<br>HvGI-Ex16Rv     | Exons 14 - 16                             | 248                                 | FS                             | NGS, Sanger                           | FS                                             | ****                 |
|             |                                |                                           | 336                                 | I15R                           | NGS                                   | Intron 15 retained                             | -                    |
| 407         |                                |                                           | I14R                                | NGS                            | Intron 14 retained                    | -                                              |                      |
| 495         |                                |                                           | I14R+I15R                           | Predicted                      | Introns 14 and 15 retained, unspliced | -                                              |                      |
| <i>TOC1</i> | HvPRR1-5UTRFwB<br>HvPRR1-Ex3Rv | Exons 1 - 3                               | 678                                 | FS                             | NGS, Sanger                           | FS                                             | ****                 |
|             |                                |                                           | 840                                 | I1R                            | Sanger                                | Intron 1 retained                              | -                    |
|             | HvPRR1-Ex3Fw<br>HvPRR1-Ex6Rv   | Exons 3 - 6                               | 463                                 | FS                             | NGS, Sanger                           | FS                                             | ****                 |
|             |                                |                                           | 297                                 | E4S                            | NGS, Sanger                           | E4 skipping                                    | -                    |
|             |                                |                                           | 593                                 | I3R                            | NGS, Sanger                           | Intron 3 retained                              | *                    |
| 793         | I3R+I4R                        | NGS                                       | Introns 3 and 4 retained, unspliced | -                              |                                       |                                                |                      |
| <i>ELF3</i> | HvELF3-Ex2Fw<br>HvELF3-Ex4Rv   | Exons 2 - 4                               | 338                                 | FS                             | NGS, Sanger                           | FS                                             | ****                 |
|             |                                |                                           | 468                                 | I3R                            | NGS, Sanger                           | Intron 3 retained                              | *                    |

| Gene         | Primer pair                     | Primer position             | Product size (bp) | AS event name | Sequencing  | AS event                             | Transcript abundance |
|--------------|---------------------------------|-----------------------------|-------------------|---------------|-------------|--------------------------------------|----------------------|
| <i>CO2</i>   | HvCO2-Ex1FwB<br>HvCO2-3UTRv     | C-terminus<br>coding region | 509               | FS            | NGS, Sanger | FS                                   | ****                 |
|              |                                 |                             | 579               | Alt 3' ss     | Sanger      | Alt 3' ss (+68 nt, PTC)              | ***                  |
|              |                                 |                             | 1004              | CrIn          | Sanger      | Cryptic intron antisense strand      | *                    |
|              |                                 |                             | 1094              | IR            | NGS, Sanger | Intron retained, unspliced           | ***                  |
| <i>PRR59</i> | HvPRR59-Ex3Fw<br>HvPRR59-Ex5RvB | Exons 3 - 5                 | 309               | FS            | NGS, Sanger | FS                                   | ****                 |
|              |                                 |                             | 611               | I4R           | NGS         | Intron 4 retained                    | -                    |
|              |                                 |                             | 614               | I3R           | NGS         | Intron 3 retained                    | -                    |
|              | HvPRR59-Ex5Fw<br>HvPRR59-Ex7RvB | Exons 5 - 7                 | 673               | FS            | NGS, Sanger | FS                                   | ****                 |
|              |                                 |                             | 601               | CrIn E6       | NGS         | Cryptic intron E6 (-72 nt, same ORF) | -                    |
|              |                                 |                             | 866               | I7R           | NGS         | Intron 7 retained                    | -                    |
|              | HvPRR59-Ex7Fw<br>HvPRR59-3UTRv  | C-terminus<br>coding region | 344               | FS            | NGS, Sanger | FS                                   | ****                 |
|              |                                 |                             | 470               | I7R           | NGS         | Intron 7 retained                    | *                    |
| <i>PRR95</i> | HvPRR95-5UTRFw<br>HvPRR95-Ex4Rv | N-terminus<br>coding region | 610               | FS            | NGS, Sanger | FS                                   | ****                 |
|              |                                 |                             | 704               | I2R           | NGS         | Intron 2 retained                    | -                    |
|              | HvPRR95-Ex4Fw<br>HvPRR95-Ex6Rv  | Exons 4 - 6                 | 612               | FS            | NGS, Sanger | FS                                   | ****                 |
|              |                                 |                             | 330               | Unknown       | Unknown     | Unknown                              | -                    |
|              |                                 |                             | 842               | I4R           | Predicted   | Intron 4 retained                    | -                    |
|              |                                 |                             | 932               | I5R           | Predicted   | Intron 5 retained                    | -                    |
|              | HvPRR95-Ex6FwB<br>HvPRR95-3UTRv | C-terminus<br>coding region | 1171              | I4R+I5R       | Predicted   | Introns 4 and 5 retained             | -                    |
|              |                                 |                             | 363               | FS            | NGS, Sanger | FS                                   | ****                 |
| 450          | I6R                             | NGS                         | Intron 6 retained | -             |             |                                      |                      |

Transcript abundance information is relative to WT plants grown under LD and 20 °C.

- Not visible or transcript level < 1% of total transcripts; \* Transcript level between 1 and 2% of total transcripts; \*\* Transcript level between 2 and 10% of total transcripts; \*\*\* Transcript level between 10 and 50% of total transcripts; \*\*\*\* Transcript level equal or greater than 50% of total transcripts.
